# Supplementary material
Source: Royal Society of Chemistry journal article supplement (doi:10.1039/d6tc00415f)
Supplement: d6tc00415f1.pdf [file d6tc00415f1.pdf]

## Supporting Information

### **Carbon dots-polyurethane composites with anisotropic enhanced fluorescence for strain sensing**

Yayuan Tian\*, Yuan Liu, Lu Li

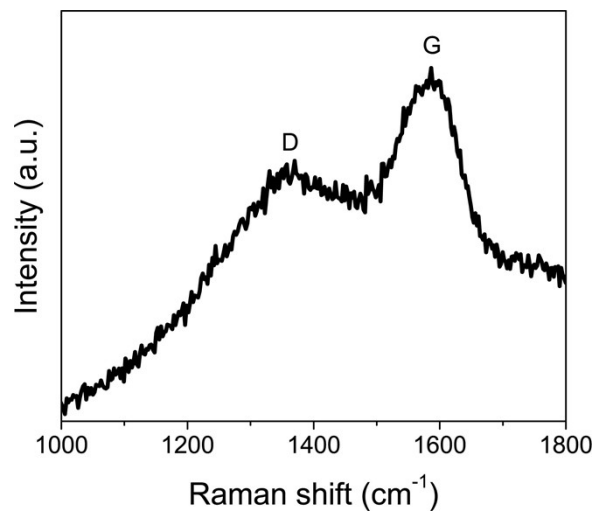

**Figure S1.** Raman spectrum of carbon nanodots.

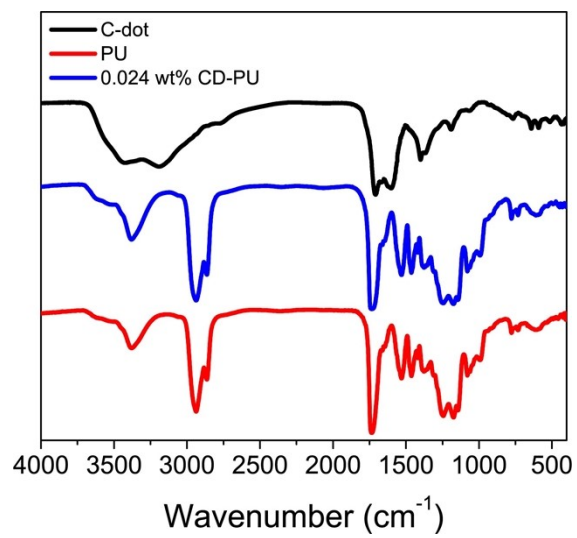

**Figure S2.** FTIR spectra of CD, PU, and CD-PU composite (0.024 wt% CD).

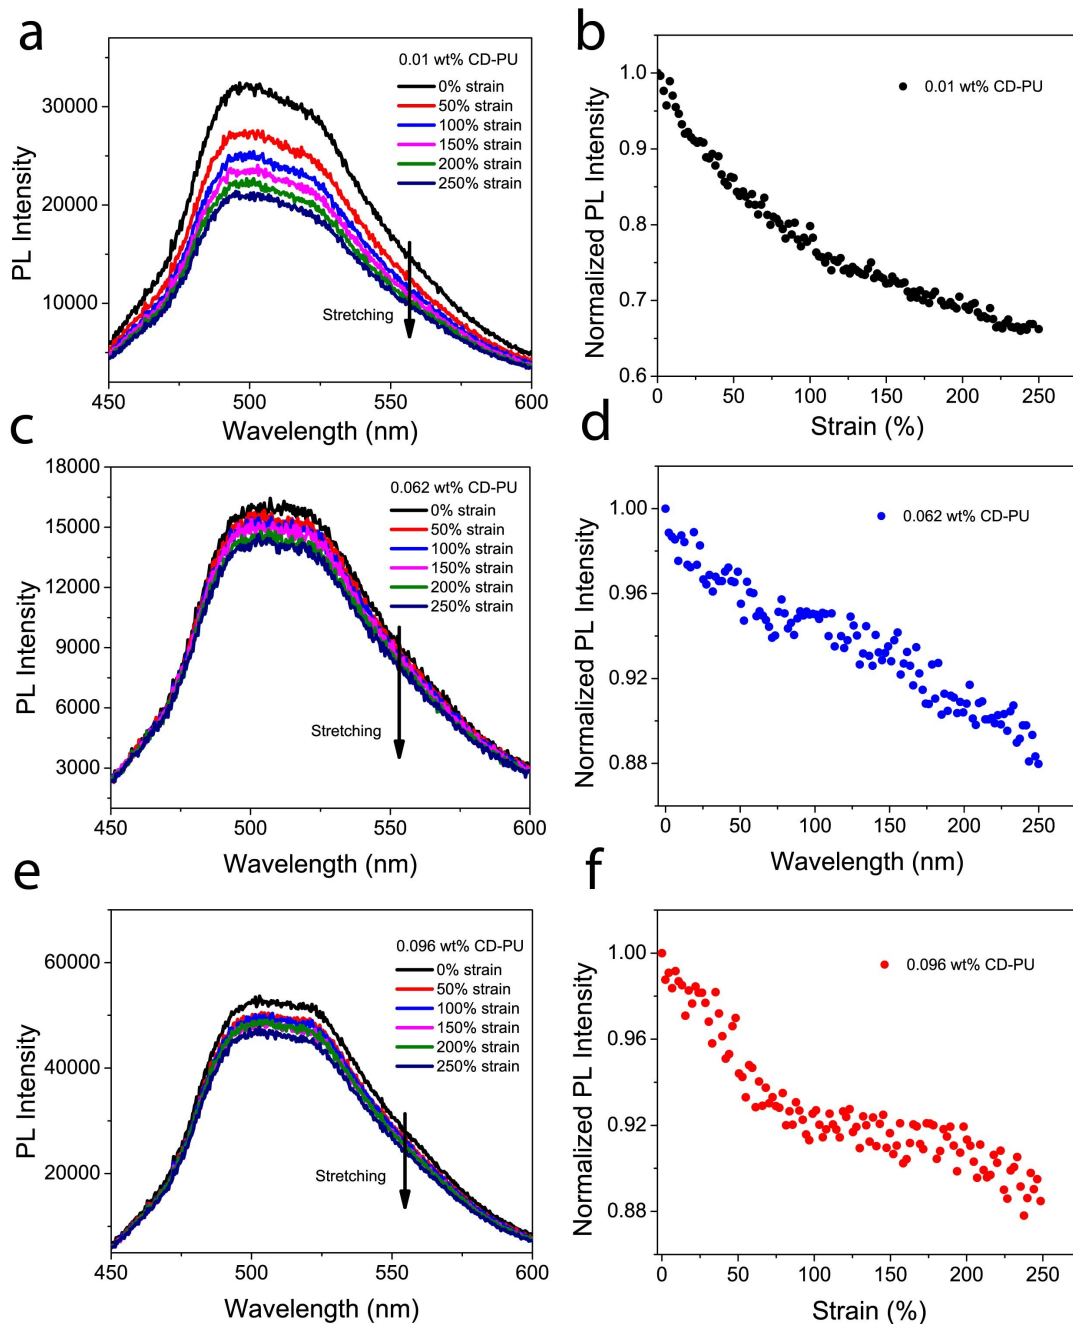

**Figure S3.** PL spectra of the CD-PU film recorded under uniaxial strain for (a) 0.01 wt% CD-PU, (c) 0.062 wt% CD-PU and (e) 0.096 wt% CD-PU. Normalized PL intensity as a function of the applied tensile strain for (b) 0.01 wt% CD-PU, (d) 0.062 wt% CD-PU and (f) 0.096 wt% CD-PU film.

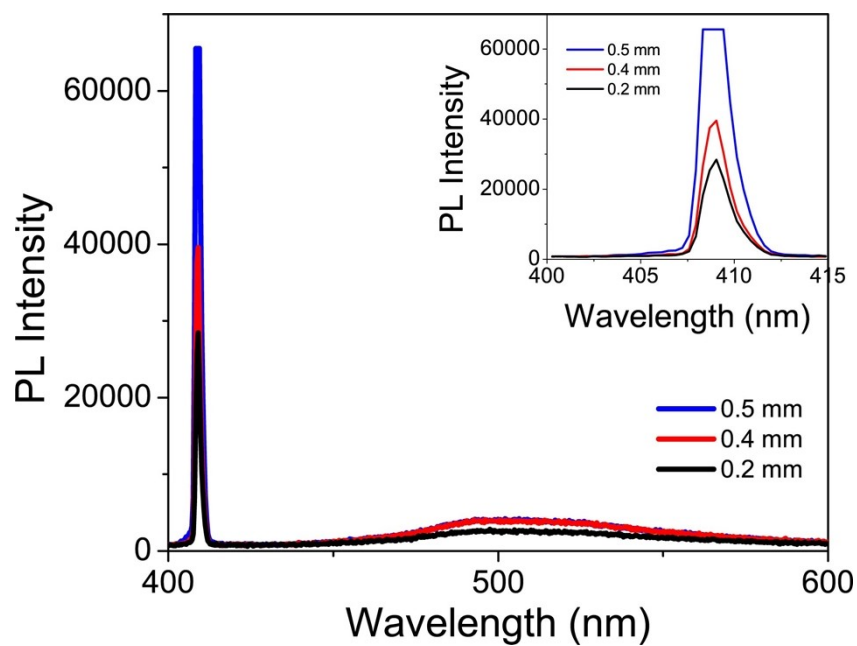

**Figure S4.** PL spectra of 0.01 wt% CD-PU film recorded with different film thickness. The inset shows an enlarged view of the excitation light intensity.

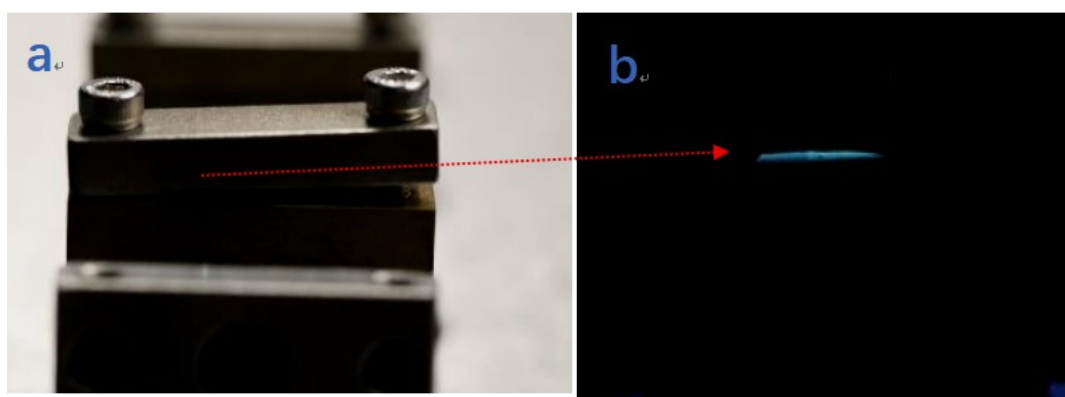

**Figure S5.** (a) The photo of 0.76 wt% CD-PU film under high compression. and (b) the corresponding fluorescence photo of the film.
